# Supplementary material for: Kinetic modeling of nitrous oxide decomposition on Fe-ZSM-5 in the presence of nitric oxide based on parameters obtained from first-principles calculations
Source: Royal Society of Chemistry journal article supplement (doi:10.1039/d1cy00252j), 2021-01-01
Supplement: d1cy00252j1.pdf [file d1cy00252j1.pdf]

## Supplementary Information for the Paper:

### **Kinetic modeling of nitrous oxide decomposition on Fe-ZSM-5 in the presence of nitric oxide based on parameters obtained from first-principles calculations**

Sara Aranifard<sup>1,\*</sup>, Alexis T. Bell<sup>2</sup>, Frerich J. Keil<sup>3</sup>, Andreas Heyden<sup>1,\*</sup>

<sup>1</sup>*Department of Chemical Engineering, University of South Carolina, 301 Main Street, Columbia, South Carolina 29208, U.S.A.*

<sup>2</sup>*Department of Chemical and Biomolecular Engineering, University of California Berkeley, Berkeley, California 94720, U.S.A.*

<sup>3</sup>*Department of Chemical Reaction Engineering, Hamburg University of Technology, 21073 Hamburg, Germany*

\*Corresponding authors: email: [sara.aranifard@gmail.com](mailto:sara.aranifard@gmail.com), [heyden@cec.sc.edu](mailto:heyden@cec.sc.edu)

## Numerical values of all data points in the Figures of the main manuscript

**Table of Figure 1:** Determination of the N<sub>2</sub>O decomposition order over monocuclear iron sites of Fe-ZSM-5 at 650 K. The N<sub>2</sub>O decomposition rate was determined at a gas composition of 1 ppb NO (solid symbols), 100 ppm NO (open symbols), varying amounts of N<sub>2</sub>O in He (10,000 – 50,000 ppm N<sub>2</sub>O), and 0.1 ppm (diamond) / 1 ppm H<sub>2</sub>O (square).

|                                      | 0.1 ppb NO<br>1 ppm H <sub>2</sub> O                                                                                | 0.1 ppb NO<br>0.1 ppm H <sub>2</sub> O | 100 ppm NO<br>1 ppm H <sub>2</sub> O | 100 ppm NO<br>0.1 ppm H <sub>2</sub> O |
|--------------------------------------|---------------------------------------------------------------------------------------------------------------------|----------------------------------------|--------------------------------------|----------------------------------------|
| Ln(p <sub>N<sub>2</sub>O</sub> /bar) | Ln(-R <sub>N<sub>2</sub>O</sub> / (mol <sub>N<sub>2</sub>O</sub> s <sup>-1</sup> mol <sub>Fe</sub> <sup>-1</sup> )) |                                        |                                      |                                        |
| -4.61                                | -8.80                                                                                                               | -6.66                                  | -6.07                                | -6.07                                  |
| -4.20                                | -8.40                                                                                                               | -6.25                                  | -5.67                                | -5.67                                  |
| -3.91                                | -8.12                                                                                                               | -5.96                                  | -5.38                                | -5.38                                  |
| -3.69                                | -7.90                                                                                                               | -5.73                                  | -5.16                                | -5.15                                  |
| -3.51                                | -7.72                                                                                                               | -5.55                                  | -4.97                                | -4.97                                  |
| -3.35                                | -7.57                                                                                                               | -5.39                                  | -4.82                                | -4.82                                  |
| -3.22                                | -7.43                                                                                                               | -5.26                                  | -4.69                                | -4.68                                  |
| -3.10                                | -7.32                                                                                                               | -5.14                                  | -4.57                                | -4.57                                  |
| -3.00                                | -7.21                                                                                                               | -5.03                                  | -4.46                                | -4.46                                  |

**Table of Figure 2:** Arrhenius plot of the N<sub>2</sub>O decomposition over monocuclear iron sites of Fe-ZSM-5 in the presence of varying amounts of nitric oxide, 0.1 (top) / 1 (bottom) ppm H<sub>2</sub>O, and 15,000 ppm N<sub>2</sub>O in He.

|            | 1 ppm H <sub>2</sub> O                                                                                                                              |           |           |            |
|------------|-----------------------------------------------------------------------------------------------------------------------------------------------------|-----------|-----------|------------|
|            | 0.1 ppb NO                                                                                                                                          | 10 ppb NO | 1 ppm NO  | 100 ppm NO |
| 1000 K / T | Ln(k <sub>app</sub> / (mol <sub>N<sub>2</sub>O</sub> s <sup>-1</sup> mol <sub>Fe</sub> <sup>-1</sup> bar <sub>N<sub>2</sub>O</sub> <sup>-1</sup> )) |           |           |            |
| 1.67       | -7.45E+00                                                                                                                                           | -3.76E+00 | -2.94E+00 | -2.92E+00  |
| 1.60       | -6.09E+00                                                                                                                                           | -3.39E+00 | -2.16E+00 | -2.14E+00  |
| 1.54       | -4.20E+00                                                                                                                                           | -2.97E+00 | -1.51E+00 | -1.47E+00  |
| 1.48       | -2.24E+00                                                                                                                                           | -1.97E+00 | -8.78E-01 | -8.15E-01  |
| 1.43       | -4.61E-01                                                                                                                                           | -4.46E-01 | -2.39E-01 | -2.06E-01  |
| 1.38       | 1.04E+00                                                                                                                                            | 1.03E+00  | 5.91E-01  | 3.66E-01   |
| 1.33       | 2.22E+00                                                                                                                                            | 2.21E+00  | 1.73E+00  | 9.17E-01   |
| 1.29       | 3.08E+00                                                                                                                                            | 3.08E+00  | 2.83E+00  | 1.49E+00   |
| 1.25       | 3.75E+00                                                                                                                                            | 3.75E+00  | 3.65E+00  | 2.19E+00   |
|            | 0.1 ppm H <sub>2</sub> O                                                                                                                            |           |           |            |
| 1.67       | -6.27E+00                                                                                                                                           | -3.73E+00 | -2.94E+00 | -2.92E+00  |
| 1.60       | -4.04E+00                                                                                                                                           | -3.12E+00 | -2.16E+00 | -2.14E+00  |
| 1.54       | -2.05E+00                                                                                                                                           | -1.93E+00 | -1.49E+00 | -1.47E+00  |
| 1.48       | -2.84E-01                                                                                                                                           | -3.14E-01 | -7.32E-01 | -8.11E-01  |
| 1.43       | 1.04E+00                                                                                                                                            | 1.03E+00  | 3.16E-01  | -1.91E-01  |
| 1.38       | 1.99E+00                                                                                                                                            | 1.98E+00  | 1.58E+00  | 4.20E-01   |
| 1.33       | 2.70E+00                                                                                                                                            | 2.70E+00  | 2.56E+00  | 1.11E+00   |
| 1.29       | 3.30E+00                                                                                                                                            | 3.30E+00  | 3.26E+00  | 2.02E+00   |
| 1.25       | 3.84E+00                                                                                                                                            | 3.84E+00  | 3.83E+00  | 3.10E+00   |

**Tables of Figure 3:** Left: Steady-state turnover frequency of monocular iron sites in Fe-ZSM-5 for the formation of NO, NO<sub>2</sub>, and N<sub>2</sub>O versus temperature. The turnover frequencies are determined at a gas composition of 1 ppm NO, 0.1 ppm H<sub>2</sub>O, and 15,000 ppm N<sub>2</sub>O in He. Right: Partial pressures of NO, NO<sub>2</sub>, and the sum of NO and NO<sub>2</sub> versus temperature during catalytic decomposition of N<sub>2</sub>O in 15,000 ppm N<sub>2</sub>O and 2000 ppm NO (0.1 ppb H<sub>2</sub>O, residence time: 0.112 sec).

Left:

| T / K | R <sub>N<sub>2</sub>O</sub> / (mol <sub>N<sub>2</sub>O</sub> s <sup>-1</sup> mol <sub>Fe</sub> <sup>-1</sup> ) | R <sub>NO</sub> / (mol <sub>NO</sub> s <sup>-1</sup> mol <sub>Fe</sub> <sup>-1</sup> ) | R <sub>NO<sub>2</sub></sub> / (mol <sub>NO<sub>2</sub></sub> s <sup>-1</sup> mol <sub>Fe</sub> <sup>-1</sup> ) | R <sub>NO</sub> + R <sub>NO<sub>2</sub></sub> |
|-------|----------------------------------------------------------------------------------------------------------------|----------------------------------------------------------------------------------------|----------------------------------------------------------------------------------------------------------------|-----------------------------------------------|
| 650   | -3.40E-03                                                                                                      | -3.30E-03                                                                              | 3.30E-03                                                                                                       | -8.90E-07                                     |
| 675   | -7.21E-03                                                                                                      | -6.00E-03                                                                              | 6.00E-03                                                                                                       | -2.15E-06                                     |
| 700   | -2.06E-02                                                                                                      | -9.23E-03                                                                              | 9.23E-03                                                                                                       | -4.07E-06                                     |
| 725   | -7.25E-02                                                                                                      | -9.93E-03                                                                              | 9.93E-03                                                                                                       | -4.87E-06                                     |
| 750   | -1.95E-01                                                                                                      | -7.04E-03                                                                              | 7.03E-03                                                                                                       | -3.19E-06                                     |
| 775   | -3.92E-01                                                                                                      | -4.42E-03                                                                              | 4.42E-03                                                                                                       | -1.26E-06                                     |
| 800   | -6.92E-01                                                                                                      | -3.26E-03                                                                              | 3.26E-03                                                                                                       | -9.20E-08                                     |

Right:

| T / K | P <sub>NO</sub> / mbar | P <sub>NO<sub>2</sub></sub> / mbar | P <sub>NO</sub> + P <sub>NO<sub>2</sub></sub> |
|-------|------------------------|------------------------------------|-----------------------------------------------|
| 660   | 8.95E-02               | 1.11E-01                           | 2.00E-01                                      |
| 680   | 8.04E-02               | 1.20E-01                           | 2.00E-01                                      |
| 700   | 1.11E-01               | 8.92E-02                           | 2.00E-01                                      |
| 720   | 1.47E-01               | 5.32E-02                           | 2.00E-01                                      |
| 740   | 1.69E-01               | 3.05E-02                           | 2.00E-01                                      |
| 760   | 1.81E-01               | 1.90E-02                           | 2.00E-01                                      |
| 780   | 1.87E-01               | 1.31E-02                           | 2.00E-01                                      |
| 800   | 1.90E-01               | 9.96E-03                           | 2.00E-01                                      |

**Table of Figure 4:** Steady-state surface fraction of  $Z^-[\text{Fe}(\text{OH})_2]^+$ ,  $Z^-[\text{FeO}_2]^+$ ,  $Z^-[\text{FeO}]^+$ ,  $Z^-[\text{FeOH}]^+$ ,  $Z^-[\text{OFeOH}]^+$ , and the sum of  $Z^-[\text{FeONO}]^+$ ,  $Z^-[\text{FeO}_2\text{N}]^+$ ,  $Z^-[\text{FeO}_2\text{NO}]^+$  in Fe-ZSM-5 versus temperature. The surface composition was determined at a gas composition with varying amounts of NO, 0.1 ppm  $\text{H}_2\text{O}$ , and 15,000 ppm  $\text{N}_2\text{O}$  in He.

| $T / \text{K}$ | Surface fraction    |                       |                                 |                      |                       |                                                                                          |
|----------------|---------------------|-----------------------|---------------------------------|----------------------|-----------------------|------------------------------------------------------------------------------------------|
|                | $Z^-[\text{FeO}]^+$ | $Z^-[\text{FeO}_2]^+$ | $Z^-[\text{Fe}(\text{OH})_2]^+$ | $Z^-[\text{FeOH}]^+$ | $Z^-[\text{OFeOH}]^+$ | $Z^-[\text{FeONO}]^+$<br>$Z^-[\text{FeO}_2\text{N}]^+$<br>$Z^-[\text{FeO}_2\text{NO}]^+$ |
| 0.1 ppb NO     |                     |                       |                                 |                      |                       |                                                                                          |
| 550            | 0.00                | 0.00                  | 0.95                            | 0.03                 | 0.0211                | 0.0000                                                                                   |
| 575            | 0.00                | 0.00                  | 0.96                            | 0.02                 | 0.0217                | 0.0000                                                                                   |
| 600            | 0.01                | 0.00                  | 0.96                            | 0.01                 | 0.0235                | 0.0000                                                                                   |
| 625            | 0.02                | 0.01                  | 0.94                            | 0.00                 | 0.0237                | 0.0000                                                                                   |
| 650            | 0.08                | 0.03                  | 0.86                            | 0.00                 | 0.0216                | 0.0000                                                                                   |
| 675            | 0.22                | 0.10                  | 0.66                            | 0.00                 | 0.0166                | 0.0000                                                                                   |
| 700            | 0.39                | 0.20                  | 0.38                            | 0.00                 | 0.0094                | 0.0000                                                                                   |
| 725            | 0.51                | 0.29                  | 0.17                            | 0.00                 | 0.0043                | 0.0000                                                                                   |
| 750            | 0.56                | 0.34                  | 0.07                            | 0.00                 | 0.0017                | 0.0000                                                                                   |
| 775            | 0.56                | 0.38                  | 0.03                            | 0.00                 | 0.0007                | 0.0000                                                                                   |
| 800            | 0.55                | 0.40                  | 0.01                            | 0.00                 | 0.0003                | 0.0000                                                                                   |
| 1 ppb NO       |                     |                       |                                 |                      |                       |                                                                                          |
| 550            | 0.00                | 0.00                  | 0.73                            | 0.26                 | 0.0168                | 0.0000                                                                                   |
| 575            | 0.00                | 0.00                  | 0.84                            | 0.14                 | 0.0202                | 0.0000                                                                                   |
| 600            | 0.00                | 0.00                  | 0.90                            | 0.07                 | 0.0219                | 0.0000                                                                                   |
| 625            | 0.02                | 0.01                  | 0.91                            | 0.04                 | 0.0224                | 0.0000                                                                                   |
| 650            | 0.08                | 0.03                  | 0.85                            | 0.02                 | 0.0210                | 0.0000                                                                                   |
| 675            | 0.21                | 0.10                  | 0.66                            | 0.01                 | 0.0164                | 0.0000                                                                                   |
| 700            | 0.39                | 0.20                  | 0.38                            | 0.00                 | 0.0095                | 0.0000                                                                                   |
| 725            | 0.51                | 0.29                  | 0.17                            | 0.00                 | 0.0043                | 0.0000                                                                                   |
| 750            | 0.56                | 0.34                  | 0.07                            | 0.00                 | 0.0017                | 0.0000                                                                                   |
| 775            | 0.56                | 0.38                  | 0.03                            | 0.00                 | 0.0007                | 0.0000                                                                                   |
| 800            | 0.55                | 0.40                  | 0.01                            | 0.00                 | 0.0003                | 0.0000                                                                                   |
| 10 ppb NO      |                     |                       |                                 |                      |                       |                                                                                          |
| 550            | 0.00                | 0.00                  | 0.23                            | 0.76                 | 0.0050                | 0.0000                                                                                   |
| 575            | 0.00                | 0.00                  | 0.37                            | 0.62                 | 0.0091                | 0.0000                                                                                   |
| 600            | 0.00                | 0.00                  | 0.55                            | 0.43                 | 0.0134                | 0.0000                                                                                   |
| 625            | 0.02                | 0.01                  | 0.69                            | 0.27                 | 0.0170                | 0.0000                                                                                   |
| 650            | 0.07                | 0.03                  | 0.73                            | 0.16                 | 0.0181                | 0.0000                                                                                   |
| 675            | 0.20                | 0.09                  | 0.61                            | 0.07                 | 0.0153                | 0.0000                                                                                   |
| 700            | 0.38                | 0.19                  | 0.37                            | 0.03                 | 0.0093                | 0.0000                                                                                   |
| 725            | 0.51                | 0.28                  | 0.17                            | 0.01                 | 0.0042                | 0.0000                                                                                   |
| 750            | 0.56                | 0.34                  | 0.07                            | 0.00                 | 0.0017                | 0.0000                                                                                   |
| 775            | 0.56                | 0.38                  | 0.03                            | 0.00                 | 0.0007                | 0.0000                                                                                   |
| 800            | 0.55                | 0.40                  | 0.01                            | 0.00                 | 0.0003                | 0.0000                                                                                   |

| 1 ppm NO   |      |      |      |      |        |        |
|------------|------|------|------|------|--------|--------|
| 550        | 0.00 | 0.00 | 0.00 | 1.00 | 0.0001 | 0.0000 |
| 575        | 0.00 | 0.00 | 0.01 | 0.99 | 0.0001 | 0.0000 |
| 600        | 0.00 | 0.00 | 0.01 | 0.99 | 0.0003 | 0.0000 |
| 625        | 0.00 | 0.00 | 0.02 | 0.97 | 0.0006 | 0.0001 |
| 650        | 0.00 | 0.00 | 0.04 | 0.95 | 0.0011 | 0.0001 |
| 675        | 0.02 | 0.01 | 0.07 | 0.89 | 0.0018 | 0.0002 |
| 700        | 0.11 | 0.05 | 0.10 | 0.73 | 0.0026 | 0.0004 |
| 725        | 0.30 | 0.17 | 0.10 | 0.42 | 0.0025 | 0.0004 |
| 750        | 0.47 | 0.29 | 0.06 | 0.15 | 0.0014 | 0.0003 |
| 775        | 0.54 | 0.36 | 0.03 | 0.04 | 0.0006 | 0.0001 |
| 800        | 0.55 | 0.40 | 0.01 | 0.01 | 0.0003 | 0.0001 |
| 10 ppm NO  |      |      |      |      |        |        |
| 550        | 0.00 | 0.00 | 0.00 | 1.00 | 0.0000 | 0.0000 |
| 575        | 0.00 | 0.00 | 0.00 | 1.00 | 0.0000 | 0.0000 |
| 600        | 0.00 | 0.00 | 0.00 | 1.00 | 0.0000 | 0.0000 |
| 625        | 0.00 | 0.00 | 0.00 | 1.00 | 0.0001 | 0.0001 |
| 650        | 0.00 | 0.00 | 0.00 | 0.99 | 0.0001 | 0.0001 |
| 675        | 0.00 | 0.00 | 0.01 | 0.99 | 0.0002 | 0.0002 |
| 700        | 0.01 | 0.01 | 0.01 | 0.96 | 0.0003 | 0.0005 |
| 725        | 0.06 | 0.03 | 0.02 | 0.88 | 0.0005 | 0.0008 |
| 750        | 0.20 | 0.11 | 0.02 | 0.65 | 0.0006 | 0.0011 |
| 775        | 0.39 | 0.25 | 0.02 | 0.32 | 0.0005 | 0.0010 |
| 800        | 0.50 | 0.34 | 0.01 | 0.11 | 0.0003 | 0.0006 |
| 100 ppm NO |      |      |      |      |        |        |
| 550        | 0.00 | 0.00 | 0.00 | 1.00 | 0.0000 | 0.0000 |
| 575        | 0.00 | 0.00 | 0.00 | 1.00 | 0.0000 | 0.0000 |
| 600        | 0.00 | 0.00 | 0.00 | 1.00 | 0.0000 | 0.0000 |
| 625        | 0.00 | 0.00 | 0.00 | 1.00 | 0.0000 | 0.0001 |
| 650        | 0.00 | 0.00 | 0.00 | 1.00 | 0.0000 | 0.0001 |
| 675        | 0.00 | 0.00 | 0.00 | 1.00 | 0.0000 | 0.0003 |
| 700        | 0.00 | 0.00 | 0.00 | 1.00 | 0.0000 | 0.0005 |
| 725        | 0.01 | 0.00 | 0.00 | 0.99 | 0.0001 | 0.0010 |
| 750        | 0.03 | 0.01 | 0.00 | 0.95 | 0.0001 | 0.0017 |
| 775        | 0.10 | 0.04 | 0.00 | 0.84 | 0.0001 | 0.0026 |
| 800        | 0.26 | 0.12 | 0.01 | 0.59 | 0.0001 | 0.0031 |

**Table of Figure 5:** Degree of thermodynamic rate control of  $Z^-[\text{FeO}]^+$ ,  $Z^-[\text{FeO}_2]^+$ ,  $Z^-[\text{FeOH}]^+$ , and  $Z^-[\text{HOFeOH}]^+$  species in Fe-ZSM-5 versus temperature for various amounts of NO, 0.1 ppm  $\text{H}_2\text{O}$ , and 15,000 ppm  $\text{N}_2\text{O}$  in He.

| T / K      | $X_{\text{TRC}}$    |                       |                        |                      |
|------------|---------------------|-----------------------|------------------------|----------------------|
|            | $Z^-[\text{FeO}]^+$ | $Z^-[\text{FeO}_2]^+$ | $Z^-[\text{HOFeOH}]^+$ | $Z^-[\text{FeOH}]^+$ |
| 0.1 ppb NO |                     |                       |                        |                      |
| 622.5      | -0.02               | -0.01                 | -0.97                  | 0.00                 |
| 642.5      | -0.06               | -0.03                 | -0.92                  | 0.00                 |
| 662.5      | -0.14               | -0.06                 | -0.81                  | 0.00                 |
| 682.5      | -0.28               | -0.13                 | -0.60                  | 0.00                 |
| 702.5      | -0.43               | -0.22                 | -0.37                  | 0.00                 |
| 722.5      | -0.53               | -0.29                 | -0.19                  | 0.00                 |
| 742.5      | -0.57               | -0.34                 | -0.09                  | 0.00                 |
| 762.5      | -0.58               | -0.38                 | -0.04                  | 0.00                 |
| 782.5      | -0.58               | -0.40                 | -0.02                  | 0.00                 |
| 800.0      | -0.57               | -0.42                 | -0.01                  | 0.00                 |
| 1 ppb NO   |                     |                       |                        |                      |
| 622.5      | -0.02               | -0.01                 | -0.94                  | -0.04                |
| 642.5      | -0.06               | -0.02                 | -0.90                  | -0.02                |
| 662.5      | -0.14               | -0.06                 | -0.80                  | -0.01                |
| 682.5      | -0.28               | -0.13                 | -0.60                  | -0.01                |
| 702.5      | -0.43               | -0.22                 | -0.37                  | 0.00                 |
| 722.5      | -0.53               | -0.29                 | -0.19                  | 0.00                 |
| 742.5      | -0.57               | -0.34                 | -0.09                  | 0.00                 |
| 762.5      | -0.58               | -0.38                 | -0.04                  | 0.00                 |
| 782.5      | -0.58               | -0.40                 | -0.02                  | 0.00                 |
| 800.0      | -0.57               | -0.42                 | -0.01                  | 0.00                 |
| 10 ppb NO  |                     |                       |                        |                      |
| 622.5      | -0.02               | -0.01                 | -0.70                  | -0.29                |
| 642.5      | -0.05               | -0.02                 | -0.75                  | -0.20                |
| 662.5      | -0.13               | -0.05                 | -0.72                  | -0.12                |
| 682.5      | -0.27               | -0.12                 | -0.57                  | -0.06                |
| 702.5      | -0.42               | -0.21                 | -0.36                  | -0.02                |
| 722.5      | -0.52               | -0.29                 | -0.19                  | -0.01                |
| 742.5      | -0.57               | -0.34                 | -0.09                  | 0.00                 |
| 762.5      | -0.58               | -0.38                 | -0.04                  | 0.00                 |
| 782.5      | -0.58               | -0.40                 | -0.02                  | 0.00                 |
| 800.0      | -0.57               | -0.42                 | -0.01                  | 0.00                 |
| 1 ppm NO   |                     |                       |                        |                      |
| 622.5      | 0.00                | 0.00                  | -0.02                  | -1.00                |
| 642.5      | 0.00                | 0.00                  | -0.04                  | -0.98                |
| 662.5      | -0.01               | 0.00                  | -0.06                  | -0.95                |
| 682.5      | -0.04               | -0.02                 | -0.09                  | -0.88                |
| 702.5      | -0.13               | -0.07                 | -0.11                  | -0.73                |

|       |            |       |       |       |
|-------|------------|-------|-------|-------|
| 722.5 | -0.29      | -0.16 | -0.11 | -0.47 |
| 742.5 | -0.45      | -0.27 | -0.07 | -0.23 |
| 762.5 | -0.54      | -0.34 | -0.04 | -0.09 |
| 782.5 | -0.57      | -0.39 | -0.02 | -0.03 |
| 800.0 | -0.57      | -0.41 | -0.01 | -0.01 |
|       | 10 ppm NO  |       |       |       |
| 622.5 | 0.00       | 0.00  | 0.00  | -1.02 |
| 642.5 | 0.00       | 0.00  | 0.00  | -1.02 |
| 662.5 | 0.00       | 0.00  | -0.01 | -1.02 |
| 682.5 | 0.00       | 0.00  | -0.01 | -1.01 |
| 702.5 | -0.02      | -0.01 | -0.02 | -0.98 |
| 722.5 | -0.06      | -0.03 | -0.02 | -0.92 |
| 742.5 | -0.16      | -0.09 | -0.03 | -0.76 |
| 762.5 | -0.31      | -0.19 | -0.02 | -0.50 |
| 782.5 | -0.45      | -0.29 | -0.02 | -0.25 |
| 800.0 | -0.52      | -0.36 | -0.01 | -0.12 |
|       | 100 ppm NO |       |       |       |
| 622.5 | 0.00       | 0.00  | 0.00  | -1.03 |
| 642.5 | 0.00       | 0.00  | 0.00  | -1.03 |
| 662.5 | 0.00       | 0.00  | 0.00  | -1.02 |
| 682.5 | 0.00       | 0.00  | 0.00  | -1.02 |
| 702.5 | 0.00       | 0.00  | 0.00  | -1.02 |
| 722.5 | -0.01      | 0.00  | 0.00  | -1.01 |
| 742.5 | -0.02      | -0.01 | 0.00  | -0.99 |
| 762.5 | -0.06      | -0.02 | 0.00  | -0.94 |
| 782.5 | -0.15      | -0.06 | -0.01 | -0.81 |
| 800.0 | -0.27      | -0.13 | -0.01 | -0.62 |



**Table of Figure 6:** Determination of the N<sub>2</sub>O reaction order for the N<sub>2</sub>O decomposition over mononuclear iron sites of Fe-ZSM-5 at low temperatures. The N<sub>2</sub>O decomposition rate was determined at a gas composition of 1 ppm H<sub>2</sub>O and varying amounts of N<sub>2</sub>O and NO in He (P<sub>N<sub>2</sub>O</sub> = 10,000 – 50,000 ppm, P<sub>N<sub>2</sub>O</sub>/P<sub>NO</sub> = 10<sup>7</sup>).

| Ln(p <sub>N<sub>2</sub>O</sub> /bar) | Ln(-R <sub>N<sub>2</sub>O</sub> /(mol <sub>N<sub>2</sub>O</sub> s <sup>-1</sup> mol <sub>Fe</sub> <sup>-1</sup> )) |           |           |
|--------------------------------------|--------------------------------------------------------------------------------------------------------------------|-----------|-----------|
|                                      | @ 550 K                                                                                                            | @ 570 K   | @ 590 K   |
| -4.61                                | -1.03E+01                                                                                                          | -1.01E+01 | -9.85E+00 |
| -4.20                                | -9.85E+00                                                                                                          | -9.64E+00 | -9.44E+00 |
| -3.91                                | -9.54E+00                                                                                                          | -9.33E+00 | -9.16E+00 |
| -3.69                                | -9.31E+00                                                                                                          | -9.13E+00 | -8.94E+00 |
| -3.51                                | -9.18E+00                                                                                                          | -8.94E+00 | -8.75E+00 |
| -3.35                                | -9.07E+00                                                                                                          | -8.78E+00 | -8.60E+00 |
| -3.22                                | -8.88E+00                                                                                                          | -8.65E+00 | -8.46E+00 |
| -3.10                                | -8.82E+00                                                                                                          | -8.54E+00 | -8.34E+00 |
| -3.00                                | -8.64E+00                                                                                                          | -8.44E+00 | -8.24E+00 |

**Table of Figure 7:** Surface composition of the most abundant surface species in Fe-ZSM-5 at a temperature of 590 K. The steady state surface composition was determined at a gas composition of 1 ppm H<sub>2</sub>O and varying amounts of N<sub>2</sub>O and fixed P<sub>N<sub>2</sub>O</sub>/P<sub>N<sub>2</sub>O</sub> ratio of 10<sup>7</sup> in He.

| p <sub>N<sub>2</sub>O</sub> / bar | Surface fraction                                  |                                    |                                                  |
|-----------------------------------|---------------------------------------------------|------------------------------------|--------------------------------------------------|
|                                   | Z <sup>-</sup> [HOF <sub>2</sub> OH] <sup>+</sup> | Z <sup>-</sup> [FeOH] <sup>+</sup> | Z <sup>-</sup> [OF <sub>2</sub> OH] <sup>+</sup> |
| 1.00E-02                          | 0.847                                             | 0.132                              | 0.021                                            |
| 1.50E-02                          | 0.847                                             | 0.132                              | 0.021                                            |
| 2.00E-02                          | 0.848                                             | 0.131                              | 0.021                                            |
| 2.50E-02                          | 0.849                                             | 0.130                              | 0.020                                            |
| 3.00E-02                          | 0.847                                             | 0.132                              | 0.021                                            |
| 3.50E-02                          | 0.848                                             | 0.131                              | 0.021                                            |
| 4.00E-02                          | 0.847                                             | 0.132                              | 0.021                                            |
| 4.50E-02                          | 0.847                                             | 0.132                              | 0.021                                            |
| 5.00E-02                          | 0.848                                             | 0.131                              | 0.021                                            |

**Table of Figure 8:** Determination of the reaction order of the N<sub>2</sub>O decomposition over mononuclear iron sites in Fe-ZSM-5 at low temperatures. The N<sub>2</sub>O decomposition rate was determined at a gas composition of 1 ppb NO, 1 ppm H<sub>2</sub>O, and varying amounts of N<sub>2</sub>O in He.

| Ln(p <sub>N<sub>2</sub>O</sub> /bar) | Ln(-R <sub>N<sub>2</sub>O</sub> /(mol <sub>N<sub>2</sub>O</sub> s <sup>-1</sup> mol <sub>Fe</sub> <sup>-1</sup> )) |            |            |
|--------------------------------------|--------------------------------------------------------------------------------------------------------------------|------------|------------|
|                                      | @ 550 K                                                                                                            | @ 570 K    | @ 590 K    |
| -4.61                                | -1.029E+01                                                                                                         | -1.005E+01 | -9.848E+00 |
| -4.20                                | -1.019E+01                                                                                                         | -9.962E+00 | -9.812E+00 |
| -3.91                                | -1.005E+01                                                                                                         | -9.903E+00 | -9.775E+00 |
| -3.69                                | -1.004E+01                                                                                                         | -9.894E+00 | -9.771E+00 |
| -3.51                                | -1.005E+01                                                                                                         | -9.880E+00 | -9.739E+00 |
| -3.35                                | -9.990E+00                                                                                                         | -9.875E+00 | -9.731E+00 |
| -3.22                                | -9.908E+00                                                                                                         | -9.871E+00 | -9.713E+00 |
| -3.10                                | -9.978E+00                                                                                                         | -9.825E+00 | -9.699E+00 |
| -3.00                                | -9.976E+00                                                                                                         | -9.853E+00 | -9.695E+00 |

**Table of Figure 9:** Surface composition of the most abundant surface species in Fe-ZSM-5 at a temperature of 590 K. The steady-state surface composition was determined at a gas composition of 1 ppb NO, 1 ppm H<sub>2</sub>O, and varying amounts of N<sub>2</sub>O in He.

| p <sub>N<sub>2</sub>O</sub> / bar | Surface fraction                                  |                                    |                                                  |
|-----------------------------------|---------------------------------------------------|------------------------------------|--------------------------------------------------|
|                                   | Z <sup>-</sup> [HOF <sub>2</sub> OH] <sup>+</sup> | Z <sup>-</sup> [FeOH] <sup>+</sup> | Z <sup>-</sup> [OF <sub>2</sub> OH] <sup>+</sup> |
| 1.00E-02                          | 0.847                                             | 0.132                              | 0.021                                            |
| 1.50E-02                          | 0.888                                             | 0.091                              | 0.021                                            |
| 2.00E-02                          | 0.907                                             | 0.070                              | 0.022                                            |
| 2.50E-02                          | 0.922                                             | 0.056                              | 0.022                                            |
| 3.00E-02                          | 0.929                                             | 0.048                              | 0.023                                            |
| 3.50E-02                          | 0.936                                             | 0.041                              | 0.023                                            |
| 4.00E-02                          | 0.940                                             | 0.037                              | 0.023                                            |
| 4.50E-02                          | 0.944                                             | 0.033                              | 0.023                                            |
| 5.00E-02                          | 0.947                                             | 0.029                              | 0.023                                            |

**Table of Figure 10:** Steady-state turnover frequency of mononuclear iron sites in Fe-ZSM-5 for the formation of nitric oxide at low temperatures. The NO formation rate was determined at a gas composition of 0.1 ppb NO, 1 ppm H<sub>2</sub>O, and varying amounts of N<sub>2</sub>O in He.

| 550 K                            |                 | 570 K                            |                 | 590 K                            |                 |
|----------------------------------|-----------------|----------------------------------|-----------------|----------------------------------|-----------------|
| P <sub>N<sub>2</sub>O</sub> /bar | R <sub>NO</sub> | P <sub>N<sub>2</sub>O</sub> /bar | R <sub>NO</sub> | P <sub>N<sub>2</sub>O</sub> /bar | R <sub>NO</sub> |
| 1.00E-06                         | -6.77E-09       | 1.00E-06                         | -1.85E-08       | 1.00E-06                         | -3.04E-08       |
| 1.00E-05                         | -8.84E-08       | 1.00E-05                         | -1.59E-07       | 1.00E-05                         | -3.22E-07       |
| 1.00E-04                         | -5.70E-07       | 1.00E-04                         | -1.16E-06       | 1.00E-04                         | -2.13E-06       |
| 1.00E-03                         | -3.25E-06       | 1.00E-03                         | -4.01E-06       | 1.00E-03                         | -4.94E-06       |
| 2.00E-03                         | -4.36E-06       | 2.00E-03                         | -4.87E-06       | 2.00E-03                         | -5.48E-06       |
| 1.00E-02                         | -4.70E-06       | 1.00E-02                         | -5.37E-06       | 1.00E-02                         | -5.55E-06       |
| 1.00E-01                         | -7.07E-06       | 9.60E-02                         | -6.76E-06       | 9.80E-02                         | -5.48E-06       |
| 2.20E-01                         | -5.54E-06       | 2.20E-01                         | -4.33E-06       | 2.20E-01                         | -2.57E-06       |
| 9.00E-01                         | -2.42E-06       | 8.00E-01                         | -7.92E-07       | 7.00E-01                         | 6.38E-07        |
| 4.97E+00                         | 2.77E-06        | 3.40E+00                         | 8.83E-06        | 2.00E+00                         | 1.64E-05        |
| 7.37E+00                         | 6.65E-06        | 5.20E+00                         | 1.42E-05        | 3.00E+00                         | 4.34E-05        |
| 1.80E+01                         | 1.56E-05        | 6.15E+00                         | 1.86E-05        | 4.40E+00                         | 6.19E-05        |
|                                  |                 | 9.97E+00                         | 6.25E-05        | 9.80E+00                         | 2.22E-04        |

\* The rates are in (mol<sub>NO</sub> s<sup>-1</sup> mol<sub>Fe</sub><sup>-1</sup>).

**Table of Figure 11:** Degree of rate control of reactions 39, 40, 42, 126, and 127 versus temperature for various amounts of NO, 0.1 ppm H<sub>2</sub>O, and 15,000 ppm N<sub>2</sub>O in He.

| T / K      | X <sub>RC</sub> |      |      |      |       |
|------------|-----------------|------|------|------|-------|
|            | R39             | R40  | R42  | R126 | R127  |
| 0.1 ppb NO |                 |      |      |      |       |
| 624.5      | 0.28            | 0.67 | 0.03 | 0.00 | 0.02  |
| 642.5      | 0.28            | 0.68 | 0.04 | 0.01 | 0.02  |
| 661.0      | 0.27            | 0.66 | 0.06 | 0.01 | -0.01 |
| 664.0      | 0.27            | 0.65 | 0.07 | 0.00 | 0.00  |
| 684.0      | 0.25            | 0.61 | 0.14 | 0.00 | 0.00  |
| 704.5      | 0.22            | 0.55 | 0.22 | 0.00 | 0.00  |
| 724.5      | 0.20            | 0.50 | 0.29 | 0.00 | 0.00  |
| 744.5      | 0.19            | 0.46 | 0.33 | 0.00 | 0.00  |
| 764.5      | 0.18            | 0.44 | 0.36 | 0.00 | 0.00  |
| 784.5      | 0.17            | 0.42 | 0.39 | 0.00 | 0.00  |
| 800.0      | 0.16            | 0.41 | 0.40 | 0.00 | 0.00  |
| 1 ppb NO   |                 |      |      |      |       |
| 624.5      | 0.22            | 0.53 | 0.03 | 0.03 | 0.19  |
| 642.5      | 0.27            | 0.64 | 0.04 | 0.02 | 0.04  |
| 664.0      | 0.27            | 0.65 | 0.07 | 0.01 | 0.00  |
| 684.0      | 0.25            | 0.60 | 0.13 | 0.01 | 0.00  |
| 704.5      | 0.22            | 0.55 | 0.22 | 0.00 | 0.00  |
| 724.5      | 0.20            | 0.50 | 0.29 | 0.00 | 0.00  |
| 744.5      | 0.19            | 0.46 | 0.33 | 0.00 | 0.00  |
| 764.5      | 0.18            | 0.44 | 0.36 | 0.00 | 0.00  |
| 784.5      | 0.17            | 0.42 | 0.39 | 0.00 | 0.00  |
| 800.0      | 0.16            | 0.41 | 0.40 | 0.00 | 0.00  |
| 10 ppb NO  |                 |      |      |      |       |
| 605.0      | 0.02            | 0.04 | 0.00 | 0.38 | 0.54  |
| 624.5      | 0.07            | 0.18 | 0.01 | 0.26 | 0.46  |
| 642.5      | 0.18            | 0.42 | 0.03 | 0.18 | 0.19  |
| 664.0      | 0.24            | 0.59 | 0.06 | 0.10 | -0.01 |
| 684.0      | 0.24            | 0.59 | 0.13 | 0.05 | -0.03 |
| 704.5      | 0.22            | 0.54 | 0.21 | 0.02 | -0.02 |
| 724.5      | 0.20            | 0.50 | 0.28 | 0.01 | -0.01 |
| 744.5      | 0.19            | 0.46 | 0.33 | 0.00 | 0.00  |
| 764.5      | 0.18            | 0.44 | 0.36 | 0.00 | 0.00  |
| 784.5      | 0.17            | 0.42 | 0.39 | 0.00 | 0.00  |
| 800.0      | 0.16            | 0.41 | 0.40 | 0.00 | 0.00  |
| 1 ppm NO   |                 |      |      |      |       |
| 605.0      | 0.00            | 0.00 | 0.00 | 0.97 | 0.01  |
| 624.5      | 0.00            | 0.00 | 0.00 | 0.96 | 0.02  |
| 642.5      | 0.00            | 0.01 | 0.00 | 0.94 | 0.02  |
| 664.0      | 0.02            | 0.05 | 0.01 | 0.91 | -0.01 |

|       |            |      |      |      |       |
|-------|------------|------|------|------|-------|
| 684.0 | 0.08       | 0.19 | 0.03 | 0.83 | -0.14 |
| 704.5 | 0.16       | 0.40 | 0.08 | 0.67 | -0.32 |
| 724.5 | 0.20       | 0.49 | 0.17 | 0.42 | -0.30 |
| 744.5 | 0.19       | 0.48 | 0.27 | 0.19 | -0.16 |
| 764.5 | 0.18       | 0.45 | 0.34 | 0.07 | -0.06 |
| 784.5 | 0.17       | 0.43 | 0.38 | 0.03 | -0.02 |
| 800.0 | 0.16       | 0.42 | 0.39 | 0.01 | -0.01 |
|       | 10 ppm NO  |      |      |      |       |
| 605.0 | 0.00       | 0.00 | 0.00 | 0.98 | 0.00  |
| 624.5 | 0.00       | 0.00 | 0.00 | 0.98 | 0.00  |
| 642.5 | 0.00       | 0.00 | 0.00 | 0.98 | 0.00  |
| 664.0 | 0.00       | 0.01 | 0.00 | 0.98 | -0.01 |
| 684.0 | 0.01       | 0.02 | 0.01 | 0.97 | -0.03 |
| 704.5 | 0.04       | 0.09 | 0.02 | 0.94 | -0.11 |
| 724.5 | 0.10       | 0.24 | 0.06 | 0.87 | -0.28 |
| 744.5 | 0.17       | 0.42 | 0.12 | 0.70 | -0.41 |
| 764.5 | 0.19       | 0.48 | 0.21 | 0.45 | -0.34 |
| 784.5 | 0.18       | 0.46 | 0.30 | 0.22 | -0.18 |
| 800.0 | 0.17       | 0.44 | 0.35 | 0.11 | -0.10 |
|       | 100 ppm NO |      |      |      |       |
| 605.0 | 0.00       | 0.00 | 0.00 | 0.99 | 0.00  |
| 624.5 | 0.00       | 0.00 | 0.00 | 0.98 | 0.00  |
| 642.5 | 0.00       | 0.00 | 0.00 | 0.98 | 0.00  |
| 664.0 | 0.00       | 0.00 | 0.00 | 0.98 | 0.00  |
| 684.0 | 0.00       | 0.00 | 0.00 | 0.98 | -0.01 |
| 704.5 | 0.00       | 0.01 | 0.01 | 0.98 | -0.02 |
| 724.5 | 0.01       | 0.03 | 0.02 | 0.97 | -0.05 |
| 744.5 | 0.04       | 0.10 | 0.04 | 0.95 | -0.14 |
| 764.5 | 0.09       | 0.24 | 0.09 | 0.89 | -0.30 |
| 784.5 | 0.16       | 0.40 | 0.15 | 0.75 | -0.43 |
| 800.0 | 0.19       | 0.48 | 0.20 | 0.58 | -0.42 |
